# Supplementary material for: Identification of Antibacterial Components and Modes in the Methanol-Phase Extract from a Herbal Plant Potentilla kleiniana Wight et Arn
Source: MDPI journal article supplement (doi:10.3390/foods12081640), 2023-04-13
Supplement: s1 [file s1]

## Supplementary Materials

**Table S1.** The oligonucleotide primers designed and used in the RT-qPCR assay.

| Strain                               | Primer       | Sequence (5'→3')        |
|--------------------------------------|--------------|-------------------------|
| <i>S. aureus</i> ATCC25923           | KQ76_04230-F | GGTATTATTGATTCTTTCCAAAC |
|                                      | KQ76_04230-R | TCGTAACCTCTTCTAATGCTTC  |
|                                      | KQ76_12495-F | GTACGAGATGTTTGGACTAGA   |
|                                      | KQ76_12495-R | GCATGATGTTTCACTCCTTTT   |
|                                      | KQ76_05765-F | GAAGTTTGGTCATCGTGGTG    |
|                                      | KQ76_05765-R | ATCTGACGGTCCTGGATTG     |
|                                      | KQ76_05755-F | ATTGATTGTGGCGACATT      |
|                                      | KQ76_05755-R | AATCCAAGCATTGCGGCTA     |
|                                      | KQ76_09185-F | CCTTATGGCGATGATTGGT     |
|                                      | KQ76_09185-R | TAAGCCAGCAGGTTTCACA     |
|                                      | KQ76_11910-F | AAAATACAGGAGATCGACCAA   |
|                                      | KQ76_11910-R | CCATACCACGAAAACCAAA     |
|                                      | KQ76_09200-F | CGGTAGGTTTGGTGGACAT     |
|                                      | KQ76_09200-R | ACGCCTCGTTTCTGGAATA     |
|                                      | KQ76_00500-F | CACATTCATCGGTTTCAGA     |
|                                      | KQ76_00500-R | CAACAATAACTTCGCATTA     |
| <i>V. parahaemolyticus</i> ATCC17802 | WU75_19785-F | GATGACAGGTGAGAAGGCTAT   |
|                                      | WU75_19785-R | GTCCTGACCAGAAATACGG     |
|                                      | WU75_00290-F | TATCGCTGAAGCCGATTTT     |
|                                      | WU75_00290-R | ACATGGCGGTAATCAATCA     |
|                                      | WU75_20180-F | GTGAGCGTGTTGCTATTGTC    |
|                                      | WU75_20180-R | GTAAGCGTCGGTATGGATG     |
|                                      | WU75_22235-F | CCAGGCTTTGGTGGTTGTG     |
|                                      | WU75_22235-R | TGAGTGTCAGTGGCGAGGT     |
|                                      | WU75_16140-F | CTCGCCGCACTGGATAACT     |
|                                      | WU75_16140-R | CGCTGCTTCTGCCTTTCAC     |
|                                      | WU75_08850-F | GGCGTGGTTAGGCACAGAT     |
|                                      | WU75_08850-R | GCCGAAGGTCGTAGTTTCA     |
|                                      | WU75_10815-F | AGTGTCAGTGAACGCAAAC     |
|                                      | WU75_10815-R | CAGAAGTAACGACGAGGAG     |
|                                      | WU75_14960-F | TTGTTGCGACGCTATTTACG    |
|                                      | WU75_14960-R | GCTGTCTGAACCCATGTTGTT   |

**Table S2.** The relative expression of the representative DEGs by the RT-qPCR assay.

| Sample                               | Gene       | Predicted protein                                          | Fold change |        |
|--------------------------------------|------------|------------------------------------------------------------|-------------|--------|
|                                      |            |                                                            | RNA-Seq.    | RT-PCR |
| <i>S. aureus</i> ATCC25923           | KQ76_04230 | Alanine-phosphoribitol ligase                              | 28.924      | 29.731 |
|                                      | KQ76_12495 | Nitrate reductase                                          | 10.404      | 8.465  |
|                                      | KQ76_05765 | Carbamoyl phosphate synthase small subunit                 | 3.084       | 6.324  |
|                                      | KQ76_05755 | Aspartate carbamoyltransferase                             | 3.213       | 12.109 |
|                                      | KQ76_09185 | Proline dehydrogenase                                      | 0.109       | 0.101  |
|                                      | KQ76_11910 | Urease subunit beta                                        | 0.412       | 0.472  |
|                                      | KQ76_09200 | Riboflavin synthase subunit alpha                          | 0.373       | 1.237  |
|                                      | KQ76_00500 | Capsular biosynthesis protein                              | 0.373       | 0.369  |
| <i>V. parahaemolyticus</i> ATCC17802 | WU75_19785 | 2-oxoglutarate dehydrogenase                               | 0.146       | 0.475  |
|                                      | WU75_00290 | Malate synthase                                            | 0.315       | 0.331  |
|                                      | WU75_20180 | 3-ketoacyl-CoA thiolase                                    | 0.305       | 0.643  |
|                                      | WU75_22235 | Multifunctional fatty acid oxidation complex subunit alpha | 0.151       | 0.149  |
|                                      | WU75_16140 | Diaminobutyrate--2-oxoglutarate aminotransferase           | 0.222       | 25.317 |
|                                      | WU75_08850 | Hydroxylamine reductase                                    | 63.107      | 59.973 |
|                                      | WU75_10815 | Nitrate reductase                                          | 6.27        | 6.86   |
|                                      | WU75_14960 | PTS fructose transporter subunit IIBC                      | 5.096       | 5.755  |

**Table S3.** Bacterial strains and media used in this study

| Bacterial Strain                                                                                                                | Culture Medium | Source              |
|---------------------------------------------------------------------------------------------------------------------------------|----------------|---------------------|
| <i>Aeromonas hydrophila</i> ATCC35654                                                                                           | TSB            | ATCC, United States |
| <i>Bacillus cereus</i> A1-1                                                                                                     | TSB            | LS-SHOU, China      |
| <i>Bacillus cereus</i> A2-                                                                                                      | TSB            | LS-SHOU, China      |
| <i>Enterobacter cloacae</i> ATCC13047                                                                                           | TSB            | Biobw, China        |
| <i>Enterobacter cloacae</i> C1-1                                                                                                | LB             | LS-SHOU, China      |
| <i>Escherichia coli</i> ATCC8739                                                                                                | TSB            | Biobw, China        |
| <i>Escherichia coli</i> ATCC25922                                                                                               | LB             | ATCC, United States |
| <i>Escherichia coli</i> K12                                                                                                     | TSB            | IIM, China          |
| <i>Enterobacter sakazakii</i> CMCC45401                                                                                         | TSB            | Biobw, China        |
| <i>Klebsiella pneumoniae</i> 8-2-10-8                                                                                           | EE             | LS-SHOU, China      |
| <i>Klebsiella pneumoniae</i> 8-2-10-8                                                                                           | EE             | LS-SHOU, China      |
| <i>Pseudomonas aeruginosa</i> ATCC9027                                                                                          | TSB            | Biobw, China        |
| <i>Pseudomonas aeruginosa</i> ATCC27853                                                                                         | TSB            | Biobw, China        |
| <i>Salmonella enterica</i> subsp. <i>enterica</i> (ex Kauffmann and Edwards) Le Minor and Popoff serovar Choleraesuis ATCC13312 | TSB            | ATCC, United States |
| <i>Salmonella paratyphi</i> -A CMCC50093                                                                                        | TSB            | GCCC, China         |
| <i>Salmonella enterica</i> subsp. <i>enterica</i> (ex Kauffmann and Edwards) Le Minor and Popoff serovar Vellore ATCC15611      | TSB            | ATCC, United States |
| <i>Salmonella</i> E1-1                                                                                                          | LB             | LS-SHOU, China      |
| <i>Shigella dysenteriae</i> CMCC 51252                                                                                          | TSB            | GCCC, China         |
| <i>Shigella flexneri</i> CMCC51572                                                                                              | TSB            | GCCC, China         |
| <i>Shigella flexneri</i> ATCC12022                                                                                              | TSB            | ATCC, United States |
| <i>Shigella flexneri</i> CMCC51574                                                                                              | TSB            | GCCC, China         |
| <i>Shigella sonnei</i> ATCC25931                                                                                                | TSB            | ATCC, United States |
| <i>Shigella sonnet</i> CMCC51592                                                                                                | TSB            | GCCC, China         |
| <i>Staphylococcus aureus</i> ATCC 25923                                                                                         | TSB            | ATCC, United States |
| <i>Staphylococcus aureus</i> ATCC 8095                                                                                          | TSB            | ATCC, United States |
| <i>Staphylococcus aureus</i> ATCC29213                                                                                          | TSB            | ATCC, United States |
| <i>Staphylococcus aureus</i> ATCC6538                                                                                           | TSB            | ATCC, United States |
| <i>Staphylococcus aureus</i> D1-1                                                                                               | TSB            | LS-SHOU, China      |
| <i>Vibrio alginolyticus</i> ATCC17749                                                                                           | TSB            | ATCC, United States |
| <i>Vibrio alginolyticus</i> ATCC33787                                                                                           | TSB            | ATCC, United States |
| <i>Vibrio cholerae</i> GIM1.449                                                                                                 | TSB            | GCCC, China         |
| <i>Vibrio cholerae</i> Q10-54                                                                                                   | TSB            | LS-SHOU, China      |
| <i>Vibrio fluvialis</i> ATCC33809                                                                                               | Marine 2216    | ATCC, United States |
| <i>Vibrio harvey</i> ATCC BAA-1117                                                                                              | Marine 2216    | ATCC, United States |
| <i>Vibrio harveyi</i> ATCC33842                                                                                                 | Marine 2216    | ATCC, United States |
| <i>Vibrio mimicus</i> bio-56759                                                                                                 | TSB            | Biobw, China        |
| <i>Vibrio parahaemolyticus</i> ATCC17802                                                                                        | TSB            | ATCC, United States |
| <i>Vibrio parahaemolyticus</i> ATCC33847                                                                                        | TSB            | ATCC, United States |
| <i>Vibrio parahaemolyticus</i> B3-13                                                                                            | TSB            | LS-SHOU, China      |
| <i>Vibrio parahaemolyticus</i> B4-10                                                                                            | TSB            | LS-SHOU, China      |
| <i>Vibrio parahaemolyticus</i> B5-29                                                                                            | TSB            | LS-SHOU, China      |
| <i>Vibrio parahaemolyticus</i> B9-35                                                                                            | TSB            | LS-SHOU, China      |
| <i>Vibrio parahemolyticus</i> A1-1                                                                                              | TSB            | LS-SHOU, China      |
| <i>Vibrio vulnificus</i> ATCC27562                                                                                              | TSB            | Biobw, China        |

ATCC: American Type Culture Collection, United States; GCCC, Guangdong Culture Collection Center, Guangzhou, China; IIM, Institute of Industrial Microbiology, Shanghai, China; LS-SHOU, Laboratory stock, Shanghai Ocean University, Shanghai, China.

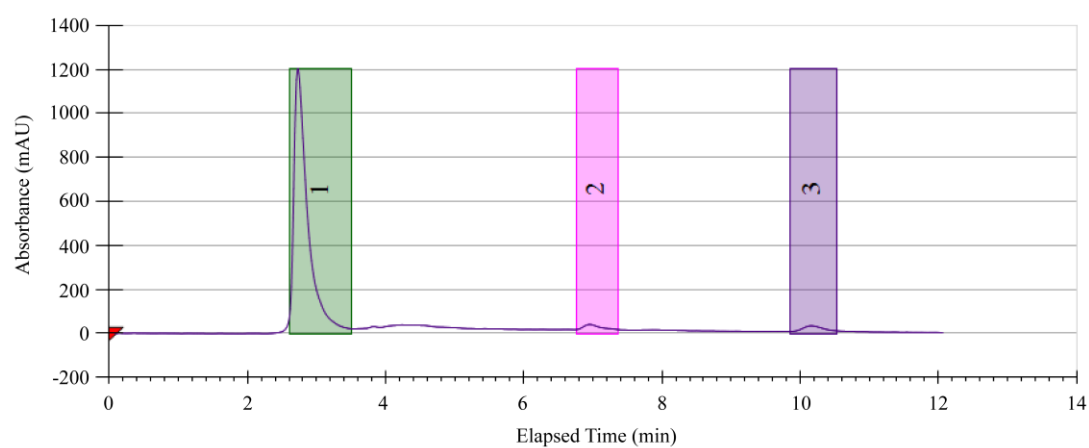

**Figure S1.** The Prep-HPLC diagram of purifying the methanol-phase crude extract from *P. kleiniana* Wight et Arn.
